# Supplementary material for: GW501516-Mediated Targeting of Tetraspanin 15 Regulates ADAM10-Dependent N-Cadherin Cleavage in Invasive Bladder Cancer Cells
Source: MDPI journal article supplement (doi:10.3390/cells13080708), 2024-04-19
Supplement: s1 [file s1]

**Table S1**

Primer and probe sequences used in RTqPCR.

| Target         | Primers (5' → 3')                                            | Probe                                |
|----------------|--------------------------------------------------------------|--------------------------------------|
| <i>Cdh2</i>    | For tgggaatccgacgaatgg<br>Rev gcagatcggaccggatactg           | 6-FAM-tgaaagacccatccacgctgagcc-BHQ-1 |
| <i>ATP5β</i>   | For tactgtcgcgtgccattgct<br>Rev cacgggcaacatcgtaatgc         | 6-FAM-atcccaacattgttggcagt-BHQ-1     |
| <i>Adam10</i>  | For aaacaccagcgtgccaaaag<br>Rev ccctcttcattcgtagggtgaaa      |                                      |
| <i>Plin2</i>   | For tgagatggcagagaacggtgtgaa<br>Rev ttgcggctctagcttctggatgat |                                      |
| <i>Rpl38</i>   | For gttgctgcttgctgtgagt<br>Rev cgaatttggcatcctttcgtc         |                                      |
| <i>Tspan5</i>  | For acaagggctcctgaagtcagtt<br>Rev tgatggaagagetgttgacaga     |                                      |
| <i>Tspan10</i> | For ctgctcaagtatctgatcttcc<br>Rev aagccacgtaacagggagg        |                                      |
| <i>Tspan14</i> | For ggctctgcgggagaatatctg<br>Rev gcactggtagctttctgaagg       |                                      |
| <i>Tspan15</i> | For acttcctgaacgacaacattcg<br>Rev cgccacagcactgaactgattt     |                                      |
| <i>Tspan17</i> | For ctgctgcgggaaatacttctt<br>Rev gatgttcgagagaacgccctt       |                                      |
| <i>Tspan33</i> | For ctacgatcggctaataagca<br>Rev tgagcaggaacatgaggacac        |                                      |
