# Supplementary material for: GW501516-Mediated Targeting of Tetraspanin 15 Regulates ADAM10-Dependent N-Cadherin Cleavage in Invasive Bladder Cancer Cells
Source: MDPI journal article supplement (doi:10.3390/cells13080708), 2024-04-19
Supplement: s1 [file s1]

## Supplementary Materials and Methods:

### Cell viability assay

Cell viability of T24 cells was determined by the Cell Proliferation Kit 1 (MTT) (Roche Diagnostics, Meylan, France) according to the manufacturer's guidelines. 20,000 cells/well were seeded in 96-well plates. Cells were stimulated in serum-free medium with or without (control cells) different concentrations of GW501516 (1, 5, 10, 15, 20, 25  $\mu$ M) for 24 h. MTT labeling reagent was then added for 4 h at 37°C leading to the formation of insoluble formazan crystals. After the addition of a solubilization solution (100  $\mu$ L/well), the formazan dye was quantified by spectrophotometry (ELISA reader, parkin Elmer). The measured absorbance [A572 nm – A635 nm] directly correlated with the number of viable cells.

### Supplementary data

#### Figure legends

**Figure S1.** TspanC8 mRNA expression in GW501516-treated T24 cells. Cells were treated with increasing concentrations of GW501516 (1, 15, 25  $\mu$ M) for 24 h. *TspanC8* mRNA expression was analyzed by RTqPCR with specific primer pairs for *Tspan5* (A), *Tspan14* (B), *Tspan17* (C), and *Tspan33* (D). Fold inductions represent comparison with vehicle-treated cells (set at 1) in the absence of GW501516. Data are means  $\pm$  SD of three independent experiments performed in triplicates.

**Figure S2.** GW501516 decreases the viability of T24 cells. Cells were incubated with different concentrations of GW501516 (1, 5, 10, 15, 20, 25  $\mu$ M). The cytotoxic effect of the PPAR $\beta/\delta$  agonist was assessed by MTT assay. Data are means  $\pm$  SD of three independent experiments performed in triplicates (\*  $p < 0.05$ ).
