# Supplementary material for: GW501516-Mediated Targeting of Tetraspanin 15 Regulates ADAM10-Dependent N-Cadherin Cleavage in Invasive Bladder Cancer Cells
Source: Cells. 2024 Apr 19;13(8):708. doi: 10.3390/cells13080708 (PMC11049359; doi:10.3390/cells13080708)
Supplement: Supplementary file 1 [file cells-13-00708-s001.zip]

Archive with 4 entries (4 files):
- Cells 2929450 Supplementary data V3 S. FAUCONNET.pdf
- Cells 2929540 Table S1 V3 S.FAUCONNET.pdf
- FIGURE S1 Supp Data S. FAUCONNET 2929540 Cells.eps
- FIGURE S2 Supp Data S. FAUCONNET 2929450 Cells.eps
